# Supplementary material for: MicroRNA-146a gene transfer ameliorates senescence and senescence-associated secretory phenotypes in tendinopathic tenocytes
Source: publisher site journal article supplement (doi:10.18632/aging.205505), 2024-02-02
Supplement: Supplementary file [file aging-v16i3-205505-supplementary-material-SD1.pdf]

## SUPPLEMENTARY TABLE

**Supplementary Table 1. Demographic and histopathological features in enrolled patients and collected long head of biceps tendons.**

| <b>Patient No.</b> | <b>Age</b> | <b>Gender</b> | <b>Histopathological severity</b> |
|--------------------|------------|---------------|-----------------------------------|
| 1                  | 59         | Male          | Mild, Moderate, Severe            |
| 2                  | 52         | Male          | Mild, Moderate                    |
| 3                  | 69         | Male          | Moderate, Severe                  |
| 4                  | 71         | Female        | Mild, Moderate                    |
| 5                  | 63         | Female        | Severe                            |
| 6                  | 71         | Female        | Mild, Moderate, Severe            |
| 7                  | 74         | Female        | Mild, Moderate, Severe            |
| 8                  | 71         | Female        | Mild, Moderate, Severe            |
| 9                  | 68         | Female        | Moderate, Severe*                 |
| 10                 | 63         | Female        | Moderate, Severe*                 |

\*No. 9 and No. 10 patients did not exhibit any miR-146a-positive cells in any histopathological severity field; hence, they were not included in the analysis of *in situ* hybridization for miR-146a. However, the miR-146a expression levels in these two patients could be detected in their specimens, and consequently, they were included in the analysis of miR-146a expression.
